# Supplementary material
Source: Royal Society of Chemistry journal article supplement (doi:10.1039/d6qi00529b)
Supplement: d6qi00529b1.pdf [file d6qi00529b1.pdf]

## Supporting Information

### **A[N(SO<sub>2</sub>NH<sub>2</sub>)<sub>2</sub>] (A=Na, K, Rb, and Cs): Enhancing Birefringence of Non $\pi$ -Conjugated Deep-Ultraviolet Crystals *via* Novel Dimeric Disulfonamide [N(SO<sub>2</sub>NH<sub>2</sub>)<sub>2</sub>]<sup>-</sup> Groups**

Yuchen Yan<sup>[a]</sup>, Xin Wen<sup>[b]</sup>, Jindong Chen<sup>[a]</sup>, Jiyang Wang<sup>[b]</sup>, Zhanggui Hu<sup>[a]</sup>, Ning Ye<sup>\*,[a]</sup>, and Guang Peng<sup>\*,[a]</sup>

[a] State Key Laboratory of Crystal Materials, Tianjin Key Laboratory of Functional Crystal Materials, Institute of Functional Crystal, College of Materials Science and Engineering, Tianjin University of Technology, Tianjin 300384, China

[b] State Key Laboratory of Crystal Materials and Institute of Crystal Materials, Shandong University, Jinan 250100, China

\* Corresponding authors, E-mail: [nye@email.tjut.edu.cn](mailto:nye@email.tjut.edu.cn), [gpeng@email.tjut.edu.cn](mailto:gpeng@email.tjut.edu.cn)

## Table of contents

### Experimental Procedures

**Table S1.** Crystallographic data of  $A[N(SO_2NH_2)_2]$  ( $A=Na, K, Rb,$  and  $Cs$ ).

**Table S2.** Fractional Atomic Coordinates ( $\times 10^4$ ) and Equivalent Isotropic Displacement Parameters ( $\text{\AA}^2 \times 10^3$ ) for  $A[N(SO_2NH_2)_2]$  ( $A=Na, K, Rb,$  and  $Cs$ ).  $U_{eq}$  is defined as  $1/3$  of the trace of the orthogonalized  $U_{ij}$  tensor.

**Table S3.** Bond Lengths and bond Angles for  $A[N(SO_2NH_2)_2]$  ( $A=Na, K, Rb,$  and  $Cs$ ).

**Table S4.** Anisotropic displacement parameters ( $\text{\AA}^2 \times 10^3$ ) for  $A[N(SO_2NH_2)_2]$  ( $A=Na, K, Rb,$  and  $Cs$ ). The anisotropic displacement factor exponent takes the form:  $-2\pi^2 [h^2 a^{*2} U_{11} + \dots + 2hk a^* b^* U_{12}]$ .

**Table S5.** Hydrogen Atom Coordinates ( $\text{\AA} \times 10^4$ ) and Isotropic Displacement Parameters ( $\text{\AA}^2 \times 10^3$ ) for  $A[N(SO_2NH_2)_2]$  ( $A=Na, K, Rb,$  and  $Cs$ ).

**Figure S1.** The calculated (blue line) and experimental (red line) PXRD patterns of  $A[N(SO_2NH_2)_2]$  ( $A = Na, K, Rb,$  and  $Cs$ ).

**Figure S2.** Calculated and experimental powder XRD patterns of  $A[N(SO_2NH_2)_2]$  ( $A = Na, K, Rb,$  and  $Cs$ ) crystals stored for nearly one year.

**Figure S3.** Energy-dispersive X-ray spectroscopy (EDS) analysis for  $A[N(SO_2NH_2)_2]$  ( $A = Na, K, Rb,$  and  $Cs$ ).

**Figure S4.** The IR spectrum of  $A[N(SO_2NH_2)_2]$  ( $A = Na, K, Rb,$  and  $Cs$ ).

**Figure S5.** The TG curves of  $A[N(SO_2NH_2)_2]$  ( $A = Na, K, Rb,$  and  $Cs$ ).

**Figure S6.** The photographs of crystals of  $A[N(SO_2NH_2)_2]$  ( $A = Na, K, Rb,$  and  $Cs$ ).

**Figure S7.** Band structures of compounds for  $A[N(SO_2NH_2)_2]$  ( $A=Na, K, Rb,$  and  $Cs$ ).

## Experimental

### Reagents

SO<sub>2</sub>(NH<sub>2</sub>)<sub>2</sub> (Adamas, >98.0%), NaOH (Greagent, ≥98.0%), KOH (Greagent, ≥95.0%), CsOH·H<sub>2</sub>O (Adamas, 99.0%), RbF (Adamas, 99.0%) and Ammonium Hydroxide (Greagent 25-28%) were used as received.

### Synthesis

The synthesis of A[N(SO<sub>2</sub>NH<sub>2</sub>)<sub>2</sub>] compounds (A = Na, K, Cs, Rb) was achieved through a slow evaporation method from aqueous solution under optimized conditions. The overall reaction is shown below:

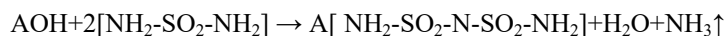

[SO<sub>2</sub>(NH<sub>2</sub>)<sub>2</sub>] and NaOH (KOH, RbF or CsOH·H<sub>2</sub>O) in a 1:2 molar ratio was added to 100 mL glass beakers containing 20 mL deionized water. Moreover, add 20 mL of ammonium hydroxide to the Na[N(SO<sub>2</sub>NH<sub>2</sub>)<sub>2</sub>] beaker and add an appropriate amount of NaOH to the Rb[N(SO<sub>2</sub>NH<sub>2</sub>)<sub>2</sub>] beaker. After several days of evaporation at 45 °C, A[N(SO<sub>2</sub>NH<sub>2</sub>)<sub>2</sub>] (A = Na, K, Cs, Rb) crystals can be obtained.

### Single crystal X-ray diffraction

Transparent bulk single crystals of A[N(SO<sub>2</sub>NH<sub>2</sub>)<sub>2</sub>] (A = Na, K, Rb, and Cs) were selected and put on the loop for the single-crystal structure determination. All of the data were collected by a Bruker D8 Venture diffractometer equipped using Mo K $\alpha$  radiation ( $\lambda = 0.71073 \text{ \AA}$ ) at room temperature. And the collected data were integrated by the SAINT program. The structure was resolved using the direct method, and the structure was optimized by full-matrix least-squares techniques using the program suite SHELXTL on F<sup>2</sup>.<sup>[1]</sup> The single-crystal data were handled with OLEX2 software, and check the symmetry of the refined structures by PLATON, and no higher symmetries were found.<sup>[2]</sup>

### Powder X-ray diffraction (XRD)

On a Rigaku Smart Lab 9kW diffractometer equipped with graphite monochromatic Cu K $\alpha$  radiation ( $\lambda = 1.5418 \text{ \AA}$ ), powder XRD patterns were characterized. The scanning angle range ( $2\theta$ ) for the test was from 10 to 70° and the scan step width and rate were 0.02° and 1 s/step, respectively.

### Thermogravimetric (TG) analysis

The thermal behavior of A[N(SO<sub>2</sub>NH<sub>2</sub>)<sub>2</sub>] (A = Na, K, Rb, and Cs) were performed using a 209F3A TG analyzer (NETZSCH Instruments). The sample of ~10 mg was enclosed in an alumina crucible and heated from 40 to 700 °C at a rate of 10 °C/min. The measurements were carried out in an atmosphere of flowing Ar.

### Infrared (IR) spectroscopy

To favourably verify the structural units, the infrared (IR) spectroscopy was recorded in the wavelength range of 400–4000 cm<sup>-1</sup> at room temperature using Nicolet iS50 FT-IR spectrometer with ATR.

### Energy-dispersive X-ray spectroscopy (EDS) analysis

Microprobe elemental analyses and elemental distribution maps were conducted using an energy-dispersive X-ray spectroscope (EDS) coupled with a field-emission scanning electron microscope (Quanta FEG 250) manufactured by FEI.

### Transmittance spectroscopy

The transmittance spectrum for A[N(SO<sub>2</sub>NH<sub>2</sub>)<sub>2</sub>] (A = Na, K, Rb, and Cs) crystal without polishing was collected on PerkinElmer Lambda-950 UV-vis-NIR spectrophotometer ranging from 190 to 1600 nm with a scan step width of 1 nm.

### **Birefringence measurements**

The birefringence of  $A[N(SO_2NH_2)_2]$  ( $A = Na, K, Rb, \text{ and } Cs$ ) were measured using an Eclipse E200MV polarizing microscope. The wavelength of the light source was 546 nm. The birefringence was determined according to the following equation:

$$\Delta R(\text{retardation}) = \Delta n \times d$$

Here,  $\Delta R$  represents the optical path difference,  $\Delta n$  represents the birefringence, and  $d$  denotes the thickness of the crystal.

### **Theoretical calculations**

The first-principles calculations for  $A[N(SO_2NH_2)_2]$  ( $A = Na, K, Rb, \text{ and } Cs$ ) were performed using the CASTEP package based on density functional theory (DFT).<sup>[3-4]</sup> The generalized gradient approximation (GGA) with the Perdew–Burke–Ernzerhof (PBE) functional was adopted to describe the exchange–correlation energy.<sup>[3]</sup> The optimized norm-conserving pseudopotentials in the Kleinman–Bylander form was used for all the elements (Na  $2s^2 2p^6 3s^1$ , K  $3s^2 3p^6 4s^1$ , Rb  $4s^2 4p^6 5s^1$ , Cs  $5s^2 5p^6 6s^1$ , S  $3s^2 3p^4$ , O  $2s^2 2p^4$ , N  $2s^2 2p^3$ , and H  $1s^1$ ) to model the effective interaction between atom cores and valence electrons.<sup>[5]</sup> The high kinetic energy cutoffs for  $A[N(SO_2NH_2)_2]$  ( $A = Na, K, Rb, \text{ and } Cs$ ) were set as 750 eV, 750 eV, 750 eV, and 750 eV, respectively. The dense Monkhorst–Pack k-point meshes in the Brillouin zones were set to  $3 \times 2 \times 1$ ,  $1 \times 2 \times 1$ ,  $1 \times 2 \times 1$ , and  $2 \times 1 \times 1$ , respectively. Because of the discontinuity of exchange–correlation energy, the band gaps calculated using GGA-PBE were usually underestimated. A scissor operator was applied to make the calculated band gaps match the measured values for the optical properties' calculations.

Table S1. Crystallographic data of A[N(SO<sub>2</sub>NH<sub>2</sub>)<sub>2</sub>] (A=Na, K, Rb, and Cs)

| Formula                                     | Na[N(SO <sub>2</sub> NH <sub>2</sub> ) <sub>2</sub> ] | K[N(SO <sub>2</sub> NH <sub>2</sub> ) <sub>2</sub> ] | Rb[N(SO <sub>2</sub> NH <sub>2</sub> ) <sub>2</sub> ] | Cs[N(SO <sub>2</sub> NH <sub>2</sub> ) <sub>2</sub> ] |
|---------------------------------------------|-------------------------------------------------------|------------------------------------------------------|-------------------------------------------------------|-------------------------------------------------------|
| Formula weight                              | 197.17                                                | 213.28                                               | 259.65                                                | 307.09                                                |
| Temperature/K                               | 293                                                   | 293                                                  | 293                                                   | 293                                                   |
| Crystal system                              | Triclinic                                             | monoclinic                                           | monoclinic                                            | monoclinic                                            |
| Space group                                 | $P\bar{1}$                                            | $P2_1/n$                                             | $P2_1/n$                                              | $P2_1/c$                                              |
| a/Å                                         | 5.2132(11)                                            | 9.268(6)                                             | 9.6096(17)                                            | 7.1310(18)                                            |
| b/Å                                         | 8.4779(18)                                            | 5.782(4)                                             | 5.7879(10)                                            | 10.448(3)                                             |
| c/Å                                         | 14.130(3)                                             | 11.971(7)                                            | 12.217(2)                                             | 10.171(3)                                             |
| $\alpha$ /°                                 | 104.982(8)                                            | 90                                                   | 90                                                    | 90                                                    |
| $\beta$ /°                                  | 97.466(9)                                             | 93.55(3)                                             | 94.418(7)                                             | 96.385(13)                                            |
| $\gamma$ /°                                 | 93.339(9)                                             | 90                                                   | 90                                                    | 90                                                    |
| Volume/Å <sup>3</sup>                       | 595.4(2)                                              | 640.3(7)                                             | 677.5(2)                                              | 753.1(4)                                              |
| Z                                           | 4                                                     | 4                                                    | 4                                                     | 4                                                     |
| $\rho$ (calc)/g/cm <sup>3</sup>             | 2.200                                                 | 2.213                                                | 2.546                                                 | 2.714                                                 |
| $\mu$ /mm <sup>-1</sup>                     | 0.921                                                 | 1.44                                                 | 7.885                                                 | 5.447                                                 |
| F(000)                                      | 400                                                   | 432                                                  | 504                                                   | 576                                                   |
| Theta range for data collection/°           | 2.498 to 27.550                                       | 2.700 to 27.593                                      | 2.601 to 27.503                                       | 2.808 to 27.530                                       |
| Index ranges                                | -6<=h<=6,<br>-11<=k<=10,<br>-18<=l<=18                | -12 ≤ h ≤ 12,<br>-7 ≤ k ≤ 7,<br>-14 ≤ l ≤ 15         | -12 ≤ h ≤ 12,<br>-7 ≤ k ≤ 7,<br>-15 ≤ l ≤ 15          | -7 ≤ h ≤ 9,<br>-13 ≤ k ≤ 13,<br>-12 ≤ l ≤ 12          |
| Reflections collected / unique              | 20072 / 2730<br>[ $R_{(int)} = 0.0679$ ]              | 3782 / 1450<br>[ $R_{(int)} = 0.0747$ ]              | 7665 / 1566<br>[ $R_{(int)} = 0.0624$ ]               | 14207 / 1724<br>[ $R_{(int)} = 0.0592$ ]              |
| Data/restraints/parameters                  | 2730 / 0 / 214                                        | 1450/0/108                                           | 1566/0/108                                            | 1724 / 0 / 108                                        |
| GOOF on F <sup>2</sup>                      | 1.075                                                 | 0.986                                                | 1.044                                                 | 1.035                                                 |
| $R_1, wR_2$ [ $I \geq 2\sigma(I)$ ]         | 0.0340, 0.0774                                        | 0.0461, 0.0919                                       | 0.0306, 0.0660                                        | 0.0161, 0.0412                                        |
| $R_1, wR_2$ [all data]                      | 0.0422, 0.0808                                        | 0.0810, 0.1072                                       | 0.0444, 0.0710                                        | 0.0181, 0.0416                                        |
| Largest diff. peak/hole / e Å <sup>-3</sup> | 0.421 and -0.450                                      | 0.436 and -0.543                                     | 0.416 and -0.404                                      | 0.720 and -0.334                                      |

$$aR_1 = \sum ||F_o| - |F_c|| / \sum |F_o|; wR_2 = [\sum w(F_o^2 - F_c^2)^2 / \sum w(F_o^2)]^{1/2} \text{ for } F_o^2 > 2\sigma(F_o^2).$$

Table S2. Fractional Atomic Coordinates ( $\times 10^4$ ) and Equivalent Isotropic Displacement Parameters ( $\text{\AA}^2 \times 10^3$ ) for A[N(SO<sub>2</sub>NH<sub>2</sub>)<sub>2</sub>] (A=Na, K, Rb, and Cs). U<sub>eq</sub> is defined as 1/3 of the trace of the orthogonalized U<sub>ij</sub> tensor.

| Na[N(SO <sub>2</sub> NH <sub>2</sub> ) <sub>2</sub> ] |          |          |         |       |
|-------------------------------------------------------|----------|----------|---------|-------|
| Atom                                                  | x        | y        | z       | U(eq) |
| Na(1)                                                 | 8287(2)  | -1253(1) | 3862(1) | 27(1) |
| Na(2)                                                 | -2808(2) | -801(1)  | 1464(1) | 25(1) |
| S(1)                                                  | -1543(1) | 2643(1)  | 311(1)  | 17(1) |
| S(2)                                                  | -974(1)  | 5323(1)  | 1967(1) | 16(1) |

|      |          |         |         |       |
|------|----------|---------|---------|-------|
| S(3) | 3149(1)  | 960(1)  | 3144(1) | 17(1) |
| S(4) | 6072(1)  | 2549(1) | 4966(1) | 17(1) |
| O(1) | -2031(4) | 1494(2) | 870(2)  | 30(1) |
| O(2) | -3005(4) | 2287(2) | -673(1) | 27(1) |
| O(3) | -1336(4) | 4334(2) | 2641(1) | 27(1) |
| O(4) | -2108(4) | 6868(2) | 2198(2) | 27(1) |
| O(5) | 486(4)   | 276(2)  | 2864(2) | 28(1) |
| O(6) | 5106(4)  | -165(2) | 2958(1) | 28(1) |
| O(7) | 7707(4)  | 1271(2) | 5082(1) | 24(1) |
| O(8) | 5347(4)  | 3495(3) | 5884(1) | 33(1) |
| N(1) | 1517(5)  | 2579(3) | 155(2)  | 25(1) |
| N(2) | -2079(4) | 4471(3) | 838(2)  | 17(1) |
| N(3) | 2154(4)  | 5586(3) | 2015(2) | 23(1) |
| N(4) | 3542(6)  | 2208(3) | 2461(2) | 28(1) |
| N(5) | 3361(4)  | 1935(3) | 4283(2) | 19(1) |
| N(6) | 7759(6)  | 3688(4) | 4493(2) | 34(1) |

#### K[N(SO<sub>2</sub>NH<sub>2</sub>)<sub>2</sub>]

| Atom | x        | y       | z       | U(eq) |
|------|----------|---------|---------|-------|
| K(1) | 11036(1) | 3657(2) | 6762(1) | 34(1) |
| S(1) | 7570(1)  | 2044(2) | 4936(1) | 22(1) |
| S(2) | 5424(1)  | 2889(2) | 6387(1) | 22(1) |
| O(1) | 8499(3)  | 3702(5) | 5524(2) | 33(1) |
| O(2) | 7634(3)  | 2007(5) | 3736(2) | 32(1) |
| O(3) | 6137(3)  | 1397(5) | 7220(2) | 34(1) |
| O(4) | 3880(3)  | 2802(5) | 6303(2) | 30(1) |
| N(1) | 8115(5)  | -509(8) | 5354(4) | 33(1) |
| N(2) | 5909(3)  | 2400(5) | 5165(3) | 22(1) |
| N(3) | 5829(5)  | 5514(7) | 6791(3) | 28(1) |

#### Rb[N(SO<sub>2</sub>NH<sub>2</sub>)<sub>2</sub>]

| Atom  | x       | y        | z       | U(eq) |
|-------|---------|----------|---------|-------|
| Rb(1) | 6025(1) | 8532(1)  | 1721(1) | 33(1) |
| S(1)  | 7494(1) | 7956(2)  | 4960(1) | 25(1) |
| S(2)  | 5462(1) | 7097(2)  | 6384(1) | 25(1) |
| O(1)  | 7555(3) | 8051(4)  | 3792(2) | 35(1) |
| O(2)  | 8383(3) | 6271(4)  | 5520(2) | 36(1) |
| O(3)  | 6190(3) | 8538(5)  | 7203(2) | 40(1) |
| O(4)  | 3963(2) | 7194(4)  | 6318(2) | 36(1) |
| N(1)  | 8049(4) | 10477(6) | 5402(3) | 37(1) |
| N(2)  | 5893(3) | 7602(5)  | 5179(2) | 25(1) |
| N(3)  | 5852(3) | 4446(5)  | 6752(2) | 28(1) |

Cs[N(SO<sub>2</sub>NH<sub>2</sub>)<sub>2</sub>]

| Atom  | x       | y       | z       | U(eq) |
|-------|---------|---------|---------|-------|
| Cs(1) | 2651(1) | 6555(1) | 4915(1) | 30(1) |
| S(1)  | 4049(1) | 4084(1) | 8011(1) | 25(1) |
| S(2)  | 1432(1) | 2170(1) | 7925(1) | 23(1) |
| O(1)  | 3849(3) | 4112(2) | 6584(2) | 38(1) |
| O(2)  | 5921(2) | 4302(2) | 8673(2) | 38(1) |
| O(3)  | -32(2)  | 3122(1) | 7763(2) | 34(1) |
| O(4)  | 1071(2) | 1068(2) | 8708(2) | 37(1) |
| N(1)  | 2777(3) | 5279(2) | 8446(2) | 35(1) |
| N(2)  | 3387(2) | 2760(2) | 8573(2) | 24(1) |
| N(3)  | 1612(3) | 1614(2) | 6439(2) | 35(1) |

Table S3. Bond Lengths and bond Angles for A[N(SO<sub>2</sub>NH<sub>2</sub>)<sub>2</sub>] (A=Na, K, Rb, and Cs)Na[N(SO<sub>2</sub>NH<sub>2</sub>)<sub>2</sub>]

|              |            |                |            |
|--------------|------------|----------------|------------|
| Na(1)-O(4)#4 | 2.450(2)   | O(1)-S(1)-O(2) | 116.15(12) |
| Na(1)-O(5)#3 | 2.484(2)   | O(1)-S(1)-N(1) | 106.09(14) |
| Na(1)-O(6)   | 2.339(2)   | O(1)-S(1)-N(2) | 113.71(12) |
| Na(1)-O(7)#2 | 2.407(2)   | O(2)-S(1)-N(1) | 105.64(13) |
| Na(1)-O(7)   | 2.439(2)   | O(2)-S(1)-N(2) | 104.78(12) |
| Na(1)-O(8)#1 | 2.728(3)   | N(2)-S(1)-N(1) | 110.19(12) |
| Na(2)-O(1)   | 2.344(2)   | O(3)-S(2)-O(4) | 114.35(12) |
| Na(2)-O(2)#5 | 2.433(2)   | O(3)-S(2)-N(2) | 115.20(11) |
| Na(2)-O(4)#6 | 2.482(2)   | O(3)-S(2)-N(3) | 104.56(13) |
| Na(2)-O(5)   | 2.387(2)   | O(4)-S(2)-N(2) | 105.28(11) |
| Na(2)-O(6)#7 | 2.450(2)   | O(4)-S(2)-N(3) | 111.84(12) |
| S(1)-O(1)    | 1.435(2)   | N(2)-S(2)-N(3) | 105.40(12) |
| S(1)-O(2)    | 1.4443(19) | O(5)-S(3)-O(6) | 116.84(12) |
| S(1)-N(1)    | 1.641(2)   | O(5)-S(3)-N(4) | 105.54(14) |
| S(1)-N(2)    | 1.594(2)   | O(5)-S(3)-N(5) | 104.56(12) |
| S(2)-O(3)    | 1.4439(19) | O(6)-S(3)-N(4) | 105.58(14) |
| S(2)-O(4)    | 1.4462(19) | O(6)-S(3)-N(5) | 113.04(11) |
| S(2)-N(2)    | 1.587(2)   | N(5)-S(3)-N(4) | 111.11(13) |
| S(2)-N(3)    | 1.623(2)   | O(7)-S(4)-O(8) | 113.90(12) |
| S(3)-O(5)    | 1.4369(19) | O(7)-S(4)-N(5) | 115.21(12) |
| S(3)-O(6)    | 1.4395(19) | O(7)-S(4)-N(6) | 104.33(15) |
| S(3)-N(4)    | 1.627(3)   | O(8)-S(4)-N(5) | 103.04(12) |
| S(3)-N(5)    | 1.594(2)   | O(8)-S(4)-N(6) | 110.59(16) |
| S(4)-O(7)    | 1.4463(19) | N(5)-S(4)-N(6) | 109.88(14) |
| S(4)-O(8)    | 1.447(2)   | S(2)-N(2)-S(1) | 121.73(13) |
| S(4)-N(5)    | 1.581(2)   | S(4)-N(5)-S(3) | 122.03(13) |
| S(4)-N(6)    | 1.593(3)   |                |            |

Symmetry transformations used to generate equivalent atoms: #1 -x+1,-y,-z+1 #2 -x+2,-y,-z+1 #3 x+1,y,z #4 x+1,y-1,z #5 -x-1,-y,-z #6 x,y-1,z #7 x-1,y,z #8 -x,-y,-z #9 x-1,y+1,z #10 x,y+1,z

K[N(SO<sub>2</sub>NH<sub>2</sub>)<sub>2</sub>]

|             |          |                |            |
|-------------|----------|----------------|------------|
| K(1)-O(4)#2 | 3.331(3) | S(2)-N(3)      | 1.629(4)   |
| K(1)-O(4)#4 | 2.770(3) | O(4)-S(2)-O(3) | 116.08(18) |
| K(1)-O(2)#5 | 2.738(3) | O(4)-S(2)-N(2) | 105.61(18) |
| K(1)-O(2)#3 | 2.872(3) | O(4)-S(2)-N(3) | 105.4(2)   |
| K(1)-O(1)#3 | 3.185(4) | O(3)-S(2)-N(2) | 112.77(18) |
| K(1)-O(1)   | 2.701(3) | O(3)-S(2)-N(3) | 105.3(2)   |
| K(1)-O(3)#2 | 2.891(3) | N(2)-S(2)-N(3) | 111.59(19) |
| S(1)-O(2)   | 1.441(3) | O(2)-S(1)-O(1) | 115.81(17) |
| S(1)-O(1)   | 1.443(3) | O(2)-S(1)-N(2) | 105.90(18) |
| S(1)-N(2)   | 1.593(3) | O(2)-S(1)-N(1) | 105.1(2)   |
| S(1)-N(1)   | 1.629(4) | O(1)-S(1)-N(2) | 112.61(18) |
| S(2)-O(4)   | 1.430(3) | O(1)-S(1)-N(1) | 106.7(2)   |
| S(2)-O(3)   | 1.447(3) | N(2)-S(1)-N(1) | 110.4(2)   |
| S(2)-N(2)   | 1.582(3) | S(2)-N(2)-S(1) | 121.0(2)   |

Symmetry transformations used to generate equivalent atoms: #1  $-x+5/2, y-1/2, -z+3/2$  #2  $-x+3/2, y+1/2, -z+3/2$  #3  $-x+2, -y+1, -z+1$  #4  $x+1, y, z$  #5  $x+1/2, -y+1/2, z+1/2$  #6  $-x+3/2, y-1/2, -z+3/2$  #7  $-x+2, -y, -z+1$  #8  $x-1, y, z$  #9  $x-1/2, -y+1/2, z-1/2$

Rb[N(SO<sub>2</sub>NH<sub>2</sub>)<sub>2</sub>]

|              |          |                |            |
|--------------|----------|----------------|------------|
| Rb(1)-O(1)#1 | 3.038(3) | S(2)-N(3)      | 1.634(3)   |
| Rb(1)-O(1)   | 2.840(2) | O(1)-S(1)-O(2) | 115.60(16) |
| Rb(1)-O(1)#3 | 3.528(3) | O(1)-S(1)-N(1) | 104.92(18) |
| Rb(1)-O(2)#4 | 2.835(2) | O(1)-S(1)-N(2) | 106.61(15) |
| Rb(1)-O(2)#1 | 3.251(3) | O(2)-S(1)-N(1) | 106.4(2)   |
| Rb(1)-O(3)#2 | 3.093(3) | O(2)-S(1)-N(2) | 112.27(15) |
| Rb(1)-O(4)#5 | 2.933(2) | N(2)-S(1)-N(1) | 110.78(17) |
| Rb(1)-O(4)#2 | 3.443(3) | O(3)-S(2)-N(2) | 112.93(15) |
| S(1)-O(1)    | 1.434(2) | O(3)-S(2)-N(3) | 105.29(16) |
| S(1)-O(2)    | 1.435(2) | O(4)-S(2)-O(3) | 116.54(16) |
| S(1)-N(1)    | 1.631(3) | O(4)-S(2)-N(2) | 105.84(15) |
| S(1)-N(2)    | 1.595(3) | O(4)-S(2)-N(3) | 105.07(17) |
| S(2)-O(3)    | 1.442(3) | N(2)-S(2)-N(3) | 110.93(16) |
| S(2)-O(4)    | 1.438(2) | S(2)-N(2)-S(1) | 120.23(16) |
| S(2)-N(2)    | 1.587(3) |                |            |

Symmetry transformations used to generate equivalent atoms: #1  $-x+3/2, y+1/2, -z+1/2$  #2  $-x+1, -y+2, -z+1$  #3  $-x+3/2, y-1/2, -z+1/2$  #4  $x-1/2, -y+3/2, z-1/2$  #5  $x+1/2, -y+3/2, z-1/2$  #6  $-x+1, -y+1, -z+1$  #7  $x+1/2, -y+3/2, z+1/2$  #8  $x-1/2, -y+3/2, z+1/2$

Cs[N(SO<sub>2</sub>NH<sub>2</sub>)<sub>2</sub>]

|              |            |                |            |
|--------------|------------|----------------|------------|
| Cs(1)-O(1)#2 | 3.1434(18) | S(2)-N(3)      | 1.633(2)   |
| Cs(1)-O(1)   | 3.1285(16) | O(1)-S(1)-O(2) | 116.59(11) |
| Cs(1)-O(2)#3 | 3.3161(16) | O(1)-S(1)-N(1) | 105.07(11) |
| Cs(1)-O(3)#1 | 3.5629(17) | O(1)-S(1)-N(2) | 112.25(9)  |

|              |            |                |            |
|--------------|------------|----------------|------------|
| Cs(1)-O(3)#4 | 3.1418(15) | O(2)-S(1)-N(1) | 105.49(11) |
| Cs(1)-O(4)#5 | 3.1581(16) | O(2)-S(1)-N(2) | 105.50(9)  |
| Cs(1)-O(4)#1 | 3.1764(18) | N(2)-S(1)-N(1) | 111.86(10) |
| S(1)-O(1)    | 1.4390(16) | O(3)-S(2)-N(2) | 111.71(9)  |
| S(1)-O(2)    | 1.4463(16) | O(3)-S(2)-N(3) | 105.70(10) |
| S(1)-N(1)    | 1.6333(19) | O(4)-S(2)-O(3) | 116.36(10) |
| S(1)-N(2)    | 1.5871(16) | O(4)-S(2)-N(2) | 106.42(9)  |
| S(2)-O(3)    | 1.4394(15) | O(4)-S(2)-N(3) | 105.25(11) |
| S(2)-O(4)    | 1.4372(16) | N(2)-S(2)-N(3) | 111.26(10) |
| S(2)-N(2)    | 1.5992(17) | S(1)-N(2)-S(2) | 117.97(9)  |

Symmetry transformations used to generate equivalent atoms: #1 -x,y+1/2,-z+3/2 #2 -x+1,-y+1,-z+1 #3 -x+1,y+1/2,-z+3/2 #4 -x,-y+1,-z+1 #5 x,-y+1/2,z-1/2 #6 x,-y+3/2,z-1/2 #7 -x+1,y-1/2,-z+3/2 #8 -x,y-1/2,-z+3/2 #9 x,-y+1/2,z+1/2 #10 x,-y+3/2,z+1/2

Table S4. Anisotropic displacement parameters ( $\text{\AA}^2 \times 10^3$ ) for  $A[\text{N}(\text{SO}_2\text{NH}_2)_2]$  ( $A = \text{Na}, \text{K}, \text{Rb}, \text{and Cs}$ ). The anisotropic displacement factor exponent takes the form:  $-2\pi^2 [h^2 a^{*2} U_{11} + \dots + 2hk a^* b^* U_{12}]$ .

#### Na[N(SO<sub>2</sub>NH<sub>2</sub>)<sub>2</sub>]

|       | U11   | U22   | U33   | U23   | U13   | U12   |
|-------|-------|-------|-------|-------|-------|-------|
| Na(1) | 25(1) | 27(1) | 27(1) | 7(1)  | 1(1)  | 7(1)  |
| Na(2) | 28(1) | 24(1) | 21(1) | 6(1)  | 1(1)  | -1(1) |
| S(1)  | 18(1) | 16(1) | 15(1) | 3(1)  | 1(1)  | -1(1) |
| S(2)  | 17(1) | 15(1) | 16(1) | 3(1)  | 4(1)  | 1(1)  |
| S(3)  | 12(1) | 17(1) | 20(1) | 4(1)  | 0(1)  | 0(1)  |
| S(4)  | 19(1) | 18(1) | 14(1) | 5(1)  | 2(1)  | 2(1)  |
| O(1)  | 46(1) | 19(1) | 27(1) | 10(1) | 9(1)  | -1(1) |
| O(2)  | 28(1) | 31(1) | 16(1) | 1(1)  | -3(1) | -3(1) |
| O(3)  | 36(1) | 27(1) | 18(1) | 9(1)  | 6(1)  | -4(1) |
| O(4)  | 29(1) | 19(1) | 29(1) | 0(1)  | 5(1)  | 6(1)  |
| O(5)  | 15(1) | 34(1) | 33(1) | 7(1)  | -2(1) | -6(1) |
| O(6)  | 25(1) | 31(1) | 25(1) | 2(1)  | 2(1)  | 13(1) |
| O(7)  | 22(1) | 26(1) | 28(1) | 12(1) | 1(1)  | 7(1)  |
| O(8)  | 43(1) | 42(1) | 14(1) | 2(1)  | 5(1)  | 16(1) |
| N(1)  | 21(1) | 26(1) | 26(1) | 3(1)  | 4(1)  | 5(1)  |
| N(2)  | 19(1) | 17(1) | 15(1) | 4(1)  | 1(1)  | 2(1)  |
| N(3)  | 17(1) | 29(1) | 20(1) | 5(1)  | -1(1) | -3(1) |
| N(4)  | 30(1) | 31(1) | 25(1) | 13(1) | 1(1)  | -4(1) |
| N(5)  | 16(1) | 23(1) | 19(1) | 4(1)  | 4(1)  | 3(1)  |
| N(6)  | 26(1) | 34(2) | 50(2) | 25(1) | 4(1)  | -5(1) |

K[N(SO<sub>2</sub>NH<sub>2</sub>)<sub>2</sub>]

|      | U11   | U22   | U33   | U23    | U13   | U12   |
|------|-------|-------|-------|--------|-------|-------|
| K(1) | 23(1) | 49(1) | 30(1) | 4(1)   | 2(1)  | -1(1) |
| S(1) | 21(1) | 28(1) | 19(1) | -1(1)  | 2(1)  | -3(1) |
| S(2) | 19(1) | 28(1) | 19(1) | 4(1)   | 2(1)  | -1(1) |
| O(1) | 26(2) | 40(2) | 35(2) | -11(1) | -1(1) | -8(1) |
| O(2) | 37(2) | 41(2) | 18(2) | 0(1)   | 4(1)  | -6(1) |
| O(3) | 37(2) | 45(2) | 22(2) | 18(1)  | 3(1)  | 10(2) |
| O(4) | 22(2) | 34(2) | 33(2) | -1(1)  | 5(1)  | -2(1) |
| N(1) | 36(3) | 36(2) | 28(2) | 3(2)   | 5(2)  | 5(2)  |
| N(2) | 19(2) | 29(2) | 18(2) | 0(1)   | 0(1)  | -2(1) |
| N(3) | 19(2) | 36(2) | 27(2) | -2(2)  | -5(2) | 0(2)  |

Rb[N(SO<sub>2</sub>NH<sub>2</sub>)<sub>2</sub>]

|       | U11   | U22   | U33   | U23    | U13   | U12   |
|-------|-------|-------|-------|--------|-------|-------|
| Rb(1) | 22(1) | 50(1) | 28(1) | 3(1)   | 1(1)  | -2(1) |
| S(1)  | 22(1) | 31(1) | 21(1) | 1(1)   | 2(1)  | 4(1)  |
| S(2)  | 18(1) | 32(1) | 25(1) | -6(1)  | 2(1)  | 0(1)  |
| O(1)  | 41(2) | 44(2) | 21(1) | 1(1)   | 6(1)  | 6(1)  |
| O(2)  | 24(1) | 49(2) | 34(1) | 10(1)  | 0(1)  | 10(1) |
| O(3)  | 36(2) | 53(2) | 30(1) | -17(1) | 5(1)  | -8(1) |
| O(4)  | 18(1) | 42(2) | 48(2) | -1(1)  | 7(1)  | 3(1)  |
| N(1)  | 40(2) | 38(2) | 35(2) | -6(2)  | 8(2)  | -7(2) |
| N(2)  | 20(1) | 31(2) | 24(1) | 0(1)   | -2(1) | 5(1)  |
| N(3)  | 25(2) | 33(2) | 26(2) | 2(1)   | 0(1)  | 2(1)  |

Cs[N(SO<sub>2</sub>NH<sub>2</sub>)<sub>2</sub>]

|       | U11   | U22   | U33   | U23   | U13   | U12   |
|-------|-------|-------|-------|-------|-------|-------|
| Cs(1) | 29(1) | 29(1) | 33(1) | 0(1)  | 0(1)  | -2(1) |
| S(1)  | 24(1) | 25(1) | 26(1) | 4(1)  | 2(1)  | 0(1)  |
| S(2)  | 22(1) | 24(1) | 24(1) | 2(1)  | 2(1)  | 1(1)  |
| O(1)  | 47(1) | 42(1) | 27(1) | 8(1)  | 7(1)  | -1(1) |
| O(2)  | 26(1) | 38(1) | 50(1) | 4(1)  | -2(1) | -5(1) |
| O(3)  | 24(1) | 34(1) | 43(1) | -2(1) | -2(1) | 8(1)  |
| O(4)  | 41(1) | 31(1) | 41(1) | 10(1) | 7(1)  | -5(1) |
| N(1)  | 34(1) | 25(1) | 45(1) | -2(1) | -1(1) | 6(1)  |
| N(2)  | 23(1) | 23(1) | 24(1) | 4(1)  | -1(1) | 1(1)  |
| N(3)  | 40(1) | 38(1) | 27(1) | -7(1) | 3(1)  | 0(1)  |

Table S5. Hydrogen atom coordinates ( $\text{\AA} \times 10^4$ ) and isotropic displacement parameters ( $\text{\AA}^2 \times 10^3$ ) for  $A[\text{N}(\text{SO}_2\text{NH}_2)_2]$  ( $A = \text{Na}, \text{K}, \text{Rb}, \text{and Cs}$ ).

$\text{Na}[\text{N}(\text{SO}_2\text{NH}_2)_2]$

| Atom  | x        | y        | z        | U(eq)  |
|-------|----------|----------|----------|--------|
| H(1A) | 2090(80) | 3530(50) | 50(30)   | 50(11) |
| H(1B) | 2380(80) | 2450(50) | 630(30)  | 44(11) |
| H(3A) | 2570(70) | 6160(40) | 1660(30) | 39(10) |
| H(3B) | 2900(70) | 5930(40) | 2560(30) | 33(10) |
| H(4A) | 2320(80) | 2850(50) | 2530(30) | 53(12) |
| H(4B) | 4920(80) | 2610(50) | 2530(30) | 46(12) |
| H(6A) | 9060(90) | 3390(50) | 4320(30) | 61(14) |
| H(6B) | 7150(70) | 4350(50) | 4340(30) | 39(11) |

$\text{K}[\text{N}(\text{SO}_2\text{NH}_2)_2]$

| Atom | x        | y          | z        | U(eq)   |
|------|----------|------------|----------|---------|
| H1A  | 7480(80) | -1630(110) | 5080(60) | 110(30) |
| H1B  | 8240(50) | -350(80)   | 5900(40) | 18(14)  |
| H3A  | 6640(40) | 5560(60)   | 6900(30) | 2(10)   |
| H3B  | 5510(60) | 6220(80)   | 6380(40) | 31(16)  |

$\text{Rb}[\text{N}(\text{SO}_2\text{NH}_2)_2]$

| Atom | x        | y         | z        | U(eq)  |
|------|----------|-----------|----------|--------|
| H1A  | 7570(50) | 11570(80) | 5150(40) | 45(14) |
| H1B  | 8280(50) | 10400(80) | 6030(40) | 52(14) |
| H3A  | 5520(40) | 3580(60)  | 6220(30) | 18(9)  |
| H3B  | 6670(50) | 4240(80)  | 6900(40) | 55(15) |

$\text{Cs}[\text{N}(\text{SO}_2\text{NH}_2)_2]$

| Atom  | x        | y        | z      | U(eq)    |
|-------|----------|----------|--------|----------|
| H(1A) | 8010(70) | 7880(60) | 43(18) | 3980(50) |
| H(1B) | 7510(70) | 9090(50) | 40(13) | 3430(50) |
| H(2A) | 7020(70) | 4620(50) | 42(16) | 710(50)  |
| H(2B) | 8230(70) | 4970(60) | 53(19) | 1790(60) |

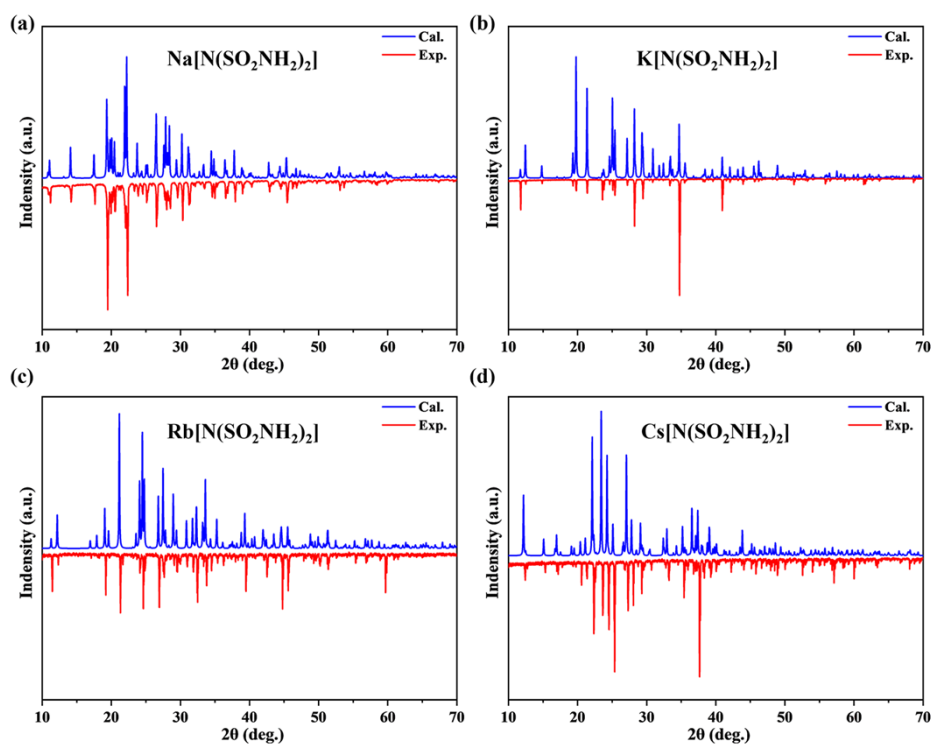

Figure S1. The calculated (blue line) and experimental (red line) PXRD patterns of A[N(SO<sub>2</sub>NH<sub>2</sub>)<sub>2</sub>] (A = Na, K, Rb, and Cs).

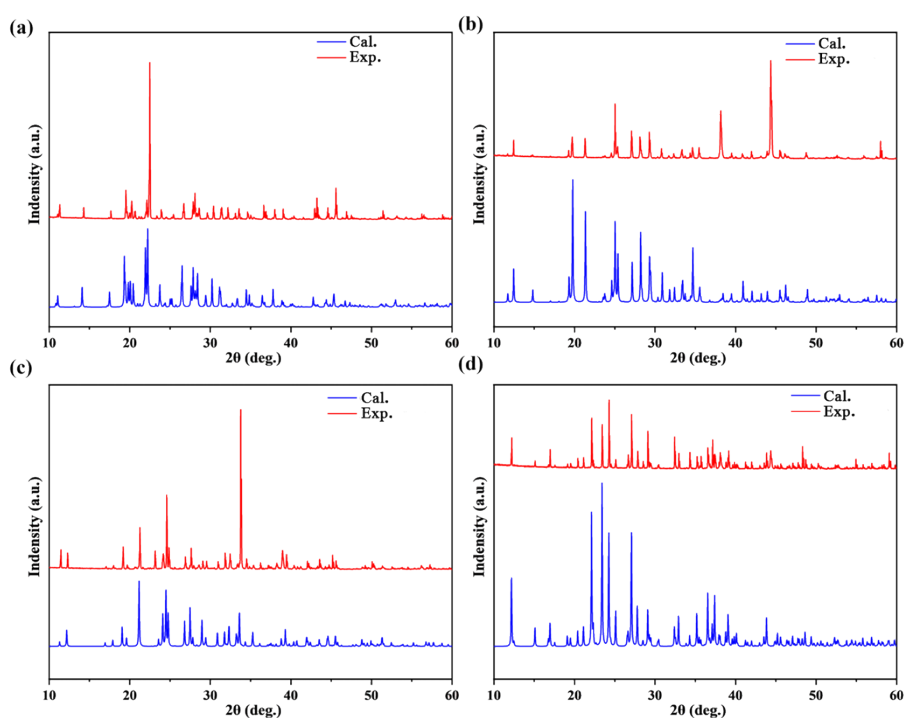

Figure S2. Calculated and experimental powder XRD patterns of A[N(SO<sub>2</sub>NH<sub>2</sub>)<sub>2</sub>] (A = Na, K, Rb, and Cs) (a-d) crystals stored for nearly one year.

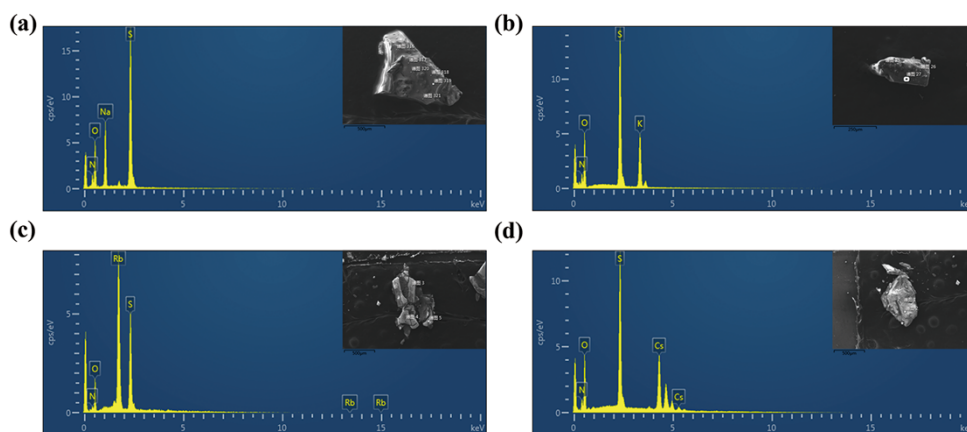

Figure S3. Energy-dispersive X-ray spectroscopy (EDS) analysis for  $\text{A}[\text{N}(\text{SO}_2\text{NH}_2)_2]$  ( $\text{A} = \text{Na}, \text{K}, \text{Rb}, \text{and Cs}$ ).

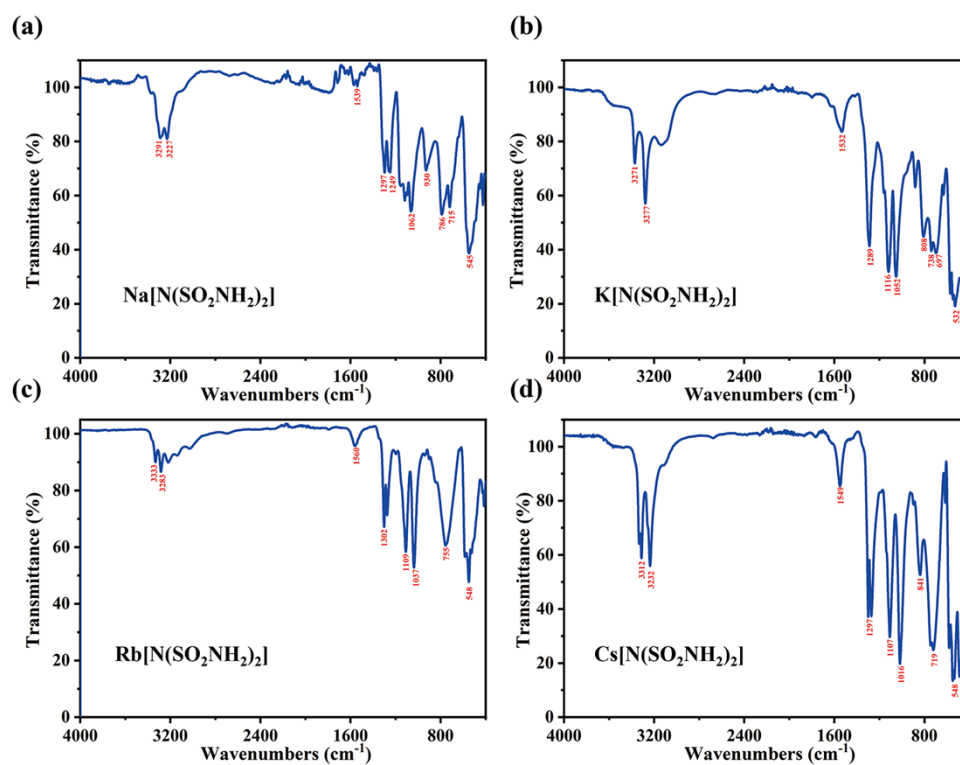

Figure S4. The IR spectrum of  $\text{A}[\text{N}(\text{SO}_2\text{NH}_2)_2]$  ( $\text{A} = \text{Na}, \text{K}, \text{Rb}, \text{and Cs}$ ).

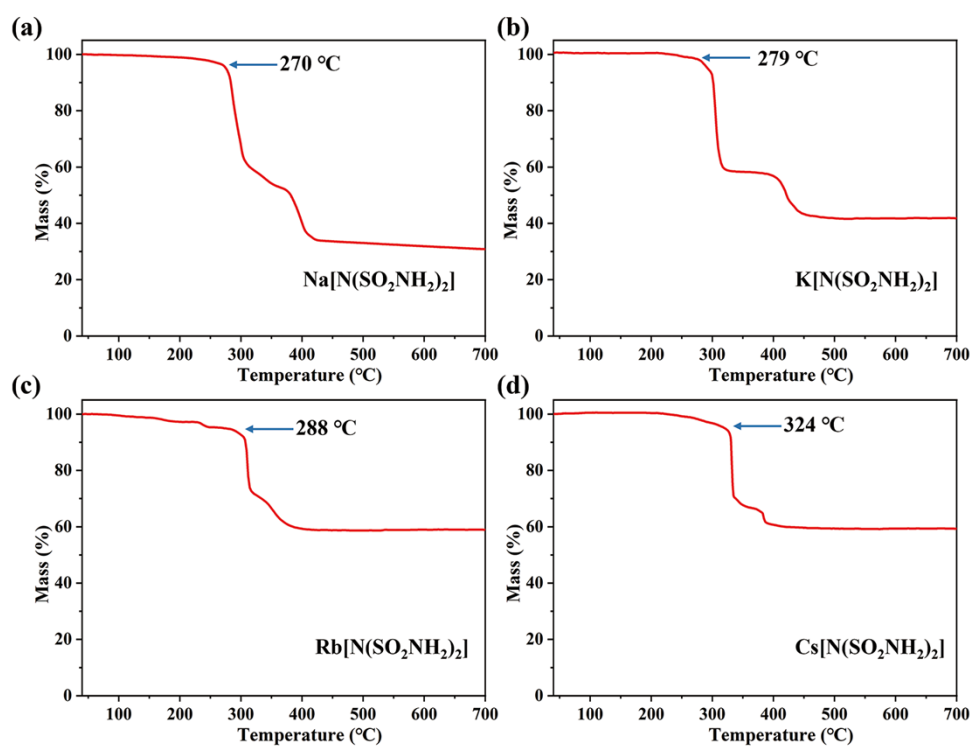

Figure S5. The TG curves of  $A[N(SO_2NH_2)_2]$  (A = Na, K, Rb, and Cs).

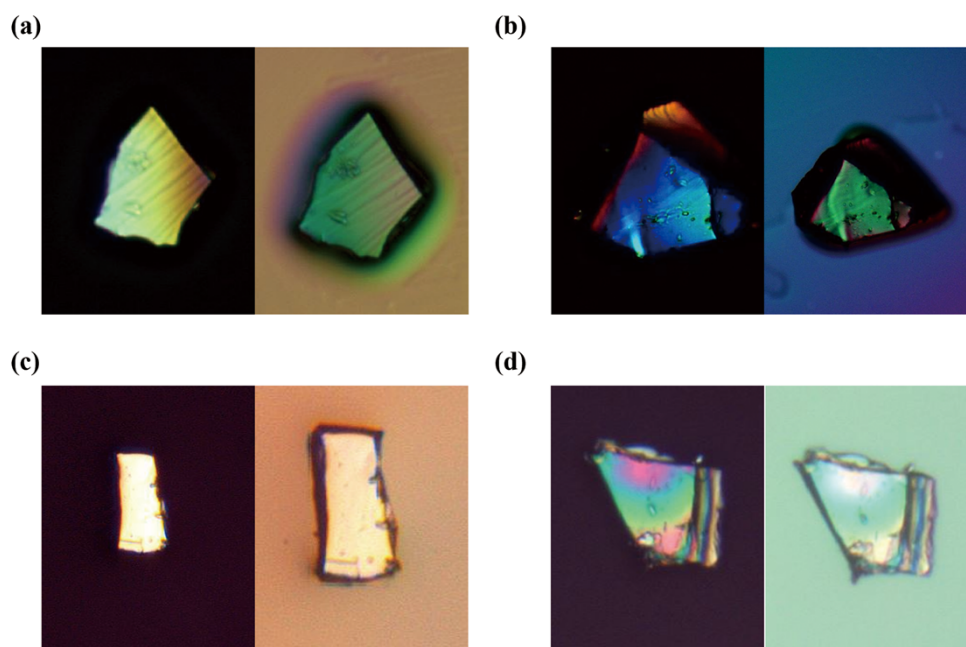

Figure S6. The photographs of crystals of  $A[N(SO_2NH_2)_2]$  (A = Na, K, Rb, and Cs).

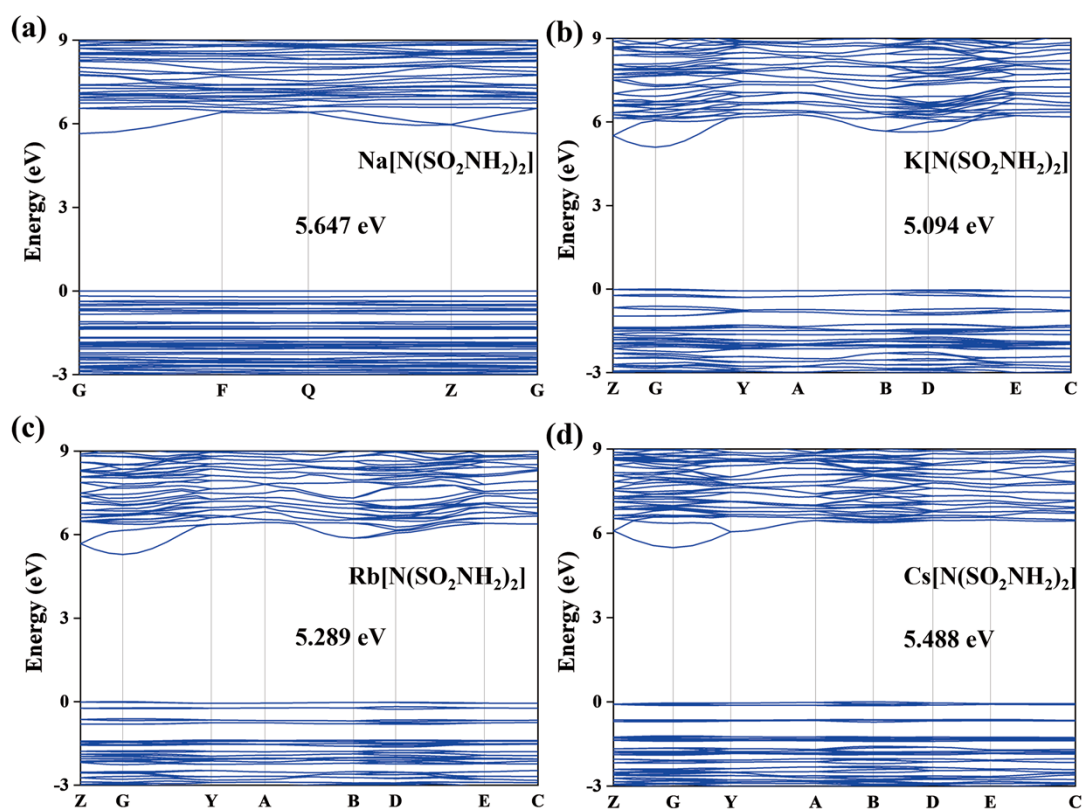

Figure S7. Band structures of compounds for  $A[\text{N}(\text{SO}_2\text{NH}_2)_2]$  ( $A = \text{Na}, \text{K}, \text{Rb}, \text{and Cs}$ ).

## References

- [1] O. V., Gildea, R. J., Howard, J. A. K., Puschmann, H. Olex2: a complete structure solution, refinement and analysis program. *J. Appl. Crystallogr.* **2009**, *42*, 339–341.
- [2] Spek, A. L. Single-Crystal Structure Validation with the Program PLATON. *J. Appl. Crystallogr.* **2003**, *36* (1), 7–13.
- [3] Payne, M. C.; Teter, M. P.; Allan, D. C.; Arias, T. A.; Joannopoulos, J. D. Iterative Minimization Techniques for Ab Initio Total-Energy Calculations: Molecular Dynamics and Conjugate Gradients. *Rev. Mod. Phys.* **1992**, *64* (4), 1045–1097.
- [4] Clark, S. J.; Segall, M. D.; Pickard, C. J.; Hasnip, P. J.; Probert, M. I. J.; Refson, K.; Payne, M. C. First Principles Methods Using CASTEP. *Zeitschrift für Krist. - Cryst. Mater.* **2005**, *220* (5–6), 567–570.
- [5] Rappe, A. M.; Rabe, K. M.; Kaxiras, E.; Joannopoulos, J. D. Optimized Pseudopotentials. *Phys. Rev. B* **1990**, *41* (2), 1227–1230.
